# Supplementary material for: Structure elucidation and control of cyclic peptide-derived nanotube assemblies in solution
Source: Royal Society of Chemistry journal article supplement (doi:10.1039/c3sc00064h), 2013-01-01
Supplement: c3sc00064h.pdf [file c3sc00064h.pdf]

# Structure elucidation and control of cyclic peptide-derived nanotube assemblies in solution

Robert Chapman, Ming Liang Koh, Gregory G. Warr, Katrina A. Jolliffe,\* Sébastien Perrier\*

Key Centre for Polymers & Colloids, School of Chemistry, Building F11, The University of Sydney, NSW 2006, Australia

kate.jolliffe@sydney.edu.au; sebastien.perrier@sydney.edu.au

**KEYWORDS:** *Nanotubes, RAFT, cyclic peptide, conjugates*

## SUPPORTING INFORMATION

### Polymer and conjugate synthesis data:

Table S1: Conditions and characterization data for polymer synthesis

| Polymer | [M]:<br>[CTA] | Time<br>(min) | <sup>1</sup> H-NMR |                    |                      | DMF SEC<br>Conventional calibration <sup>[a]</sup> |                                          |                                |
|---------|---------------|---------------|--------------------|--------------------|----------------------|----------------------------------------------------|------------------------------------------|--------------------------------|
|         |               |               | X (%)              | DP <sub>Theo</sub> | DP <sub>Actual</sub> | M <sub>n</sub><br>(g.mol <sup>-1</sup> )           | M <sub>n</sub><br>(g.mol <sup>-1</sup> ) | M <sub>w</sub> /M <sub>n</sub> |
| pBA16   | 18            | 157           | 79                 | 14                 | 16                   | 2,320                                              | 2,250                                    | 1.15                           |
| pBA30   | 35            | 140           | 79                 | 28                 | 30                   | 4,150                                              | 3,450                                    | 1.16                           |
| pBA70   | 120           | 55            | 56                 | 67                 | 70                   | 9,280                                              | 6,590                                    | 1.15                           |
| pBA91   | 120           | 100           | 73                 | 88                 | 91                   | 11,940                                             | 8,450                                    | 1.16                           |
| pBA108  | 120           | 135           | 84                 | 101                | 108                  | 14,150                                             | 11,400                                   | 1.15                           |
| pBA195  | 250           | 123           | 79                 | 198                | 195                  | 25,240                                             | 18,500                                   | 1.19                           |

Notes: [a] Conventional calibration relative to pS standards. Uncorrected with Mark Houwink parameters.

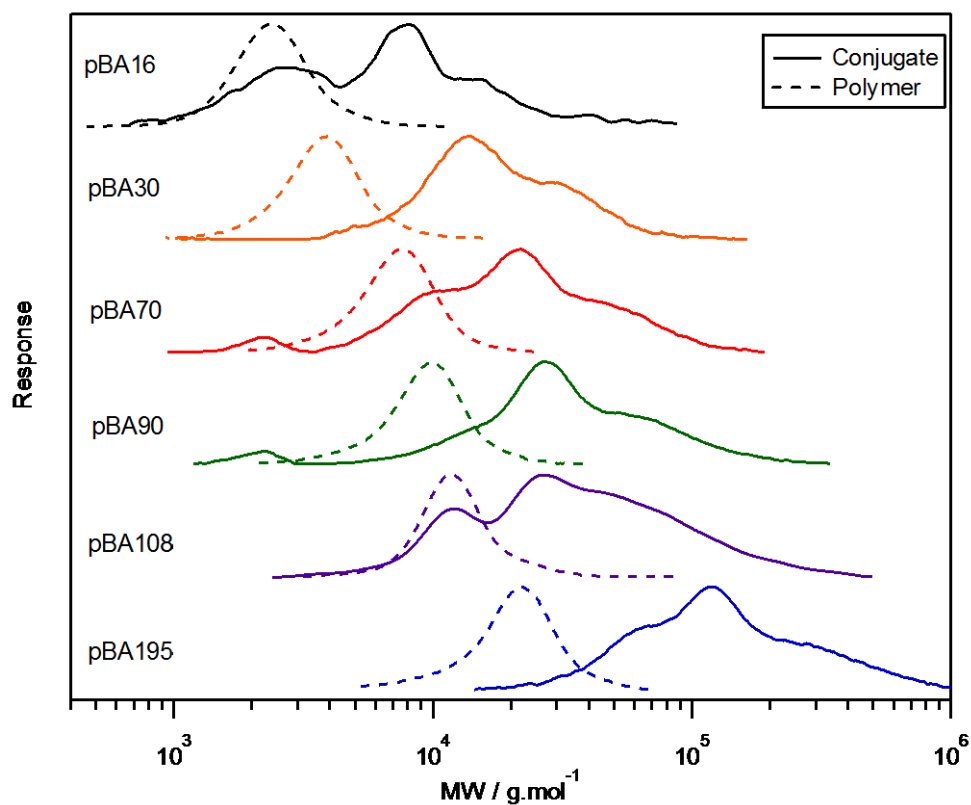

Figure S1: SEC traces of pBA-CP conjugates prepared in the microwave reactor at 100 °C for 15 min. 2.10 equivalents of polymer per peptide were used in each case.

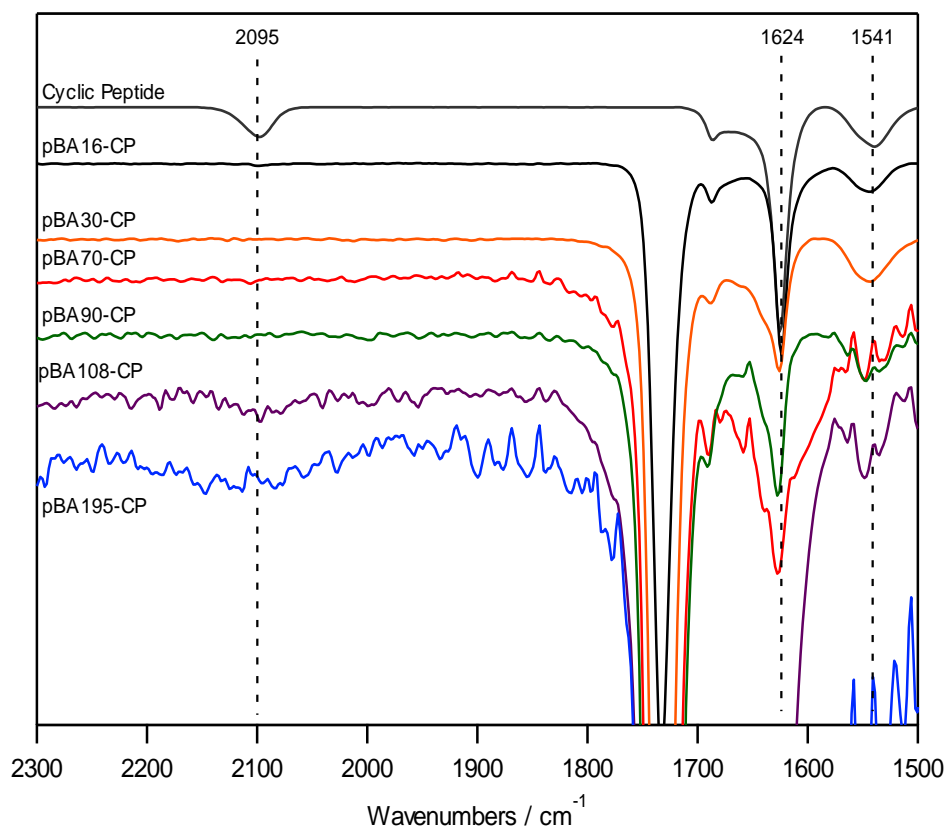

Figure S2: ATR-IR traces of the 2 arm cyclic peptide and pBA-CP conjugates prepared in the microwave reactor at 100 °C for 15 min. 2.10 equivalents of polymer per peptide were used in each case.

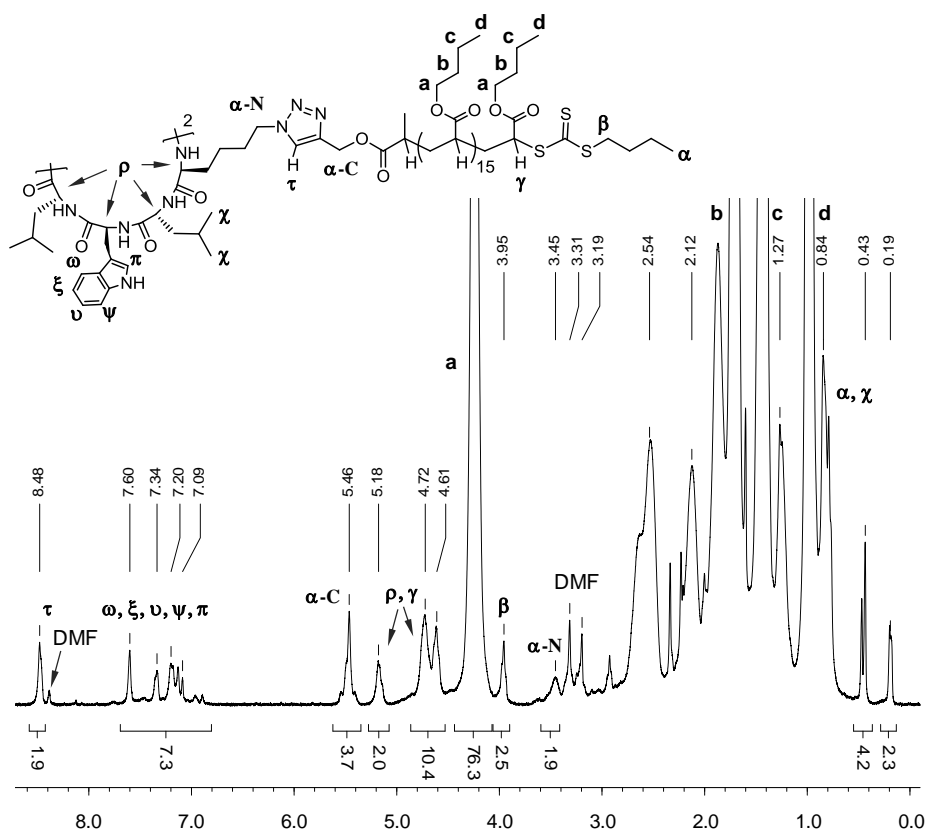

Figure S3:  $^1\text{H-NMR}$  of  $(\text{pBA}_{16})_2\text{-CP}$  in  $d\text{-TFA}$

### Stability of the conjugates to TFA:

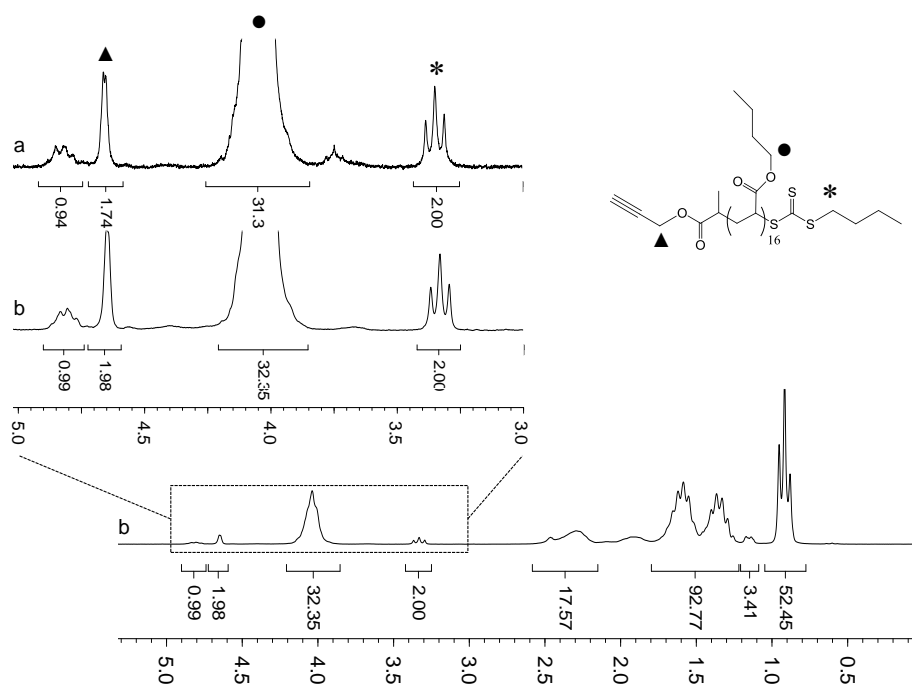

Figure S4:  $^1\text{H-NMR}$  ( $\text{CDCl}_3$ ) of  $\text{pBA}_{16}\text{a}$  before and b) after heating in TFA at  $60\text{ }^\circ\text{C}$

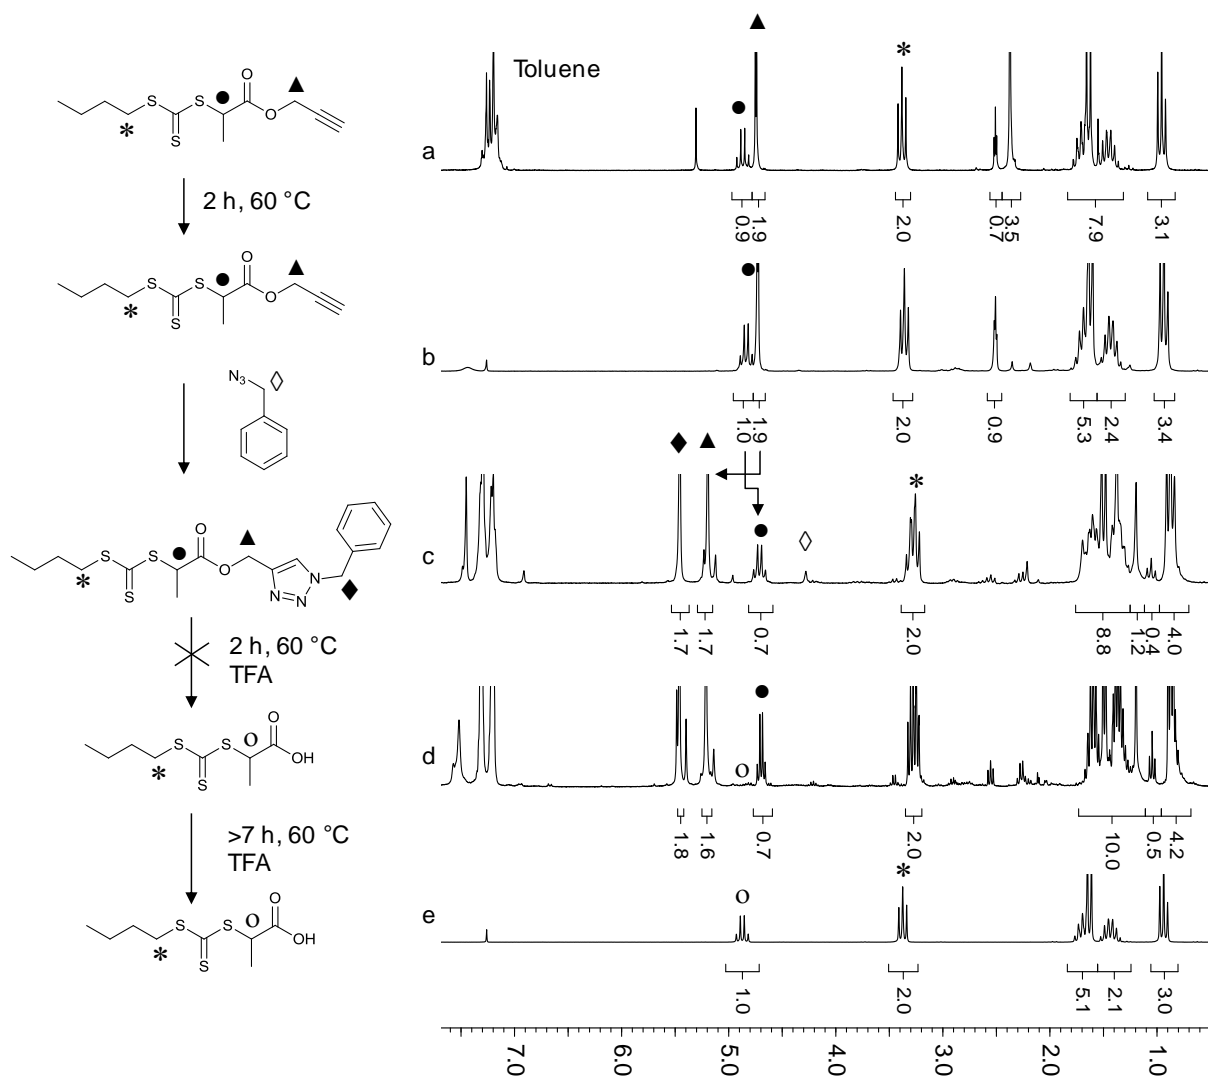

Figure S5: <sup>1</sup>H-NMR (CDCl<sub>3</sub>) of PABTC a) before and b) after, and a model conjugate c) before, and d) after heating in TFA at 60 °C. e) <sup>1</sup>H-NMR (CDCl<sub>3</sub>) spectrum of hydrolysed RAFT agent.

## Self assembly DLS

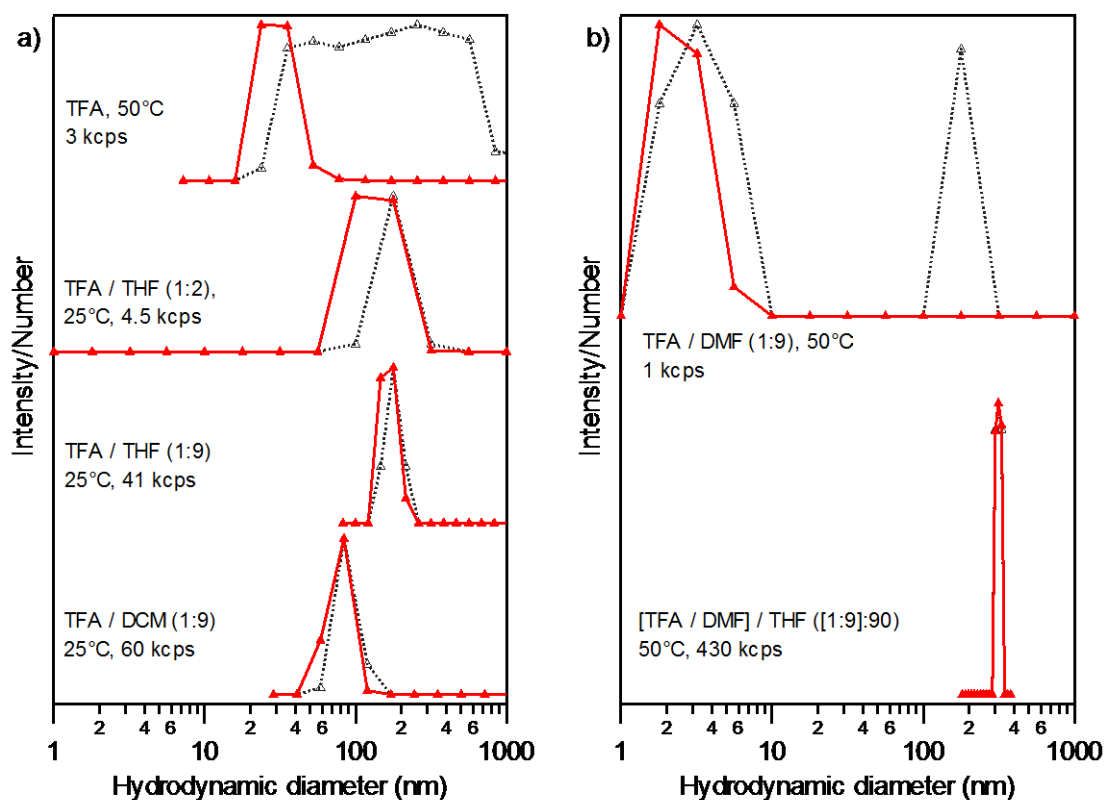

Figure S1: Dynamic light scattering intensity ( $\Delta$ ) and number ( $\blacktriangle$ ) distributions for (pBA<sub>16</sub>)<sub>2</sub>-CP conjugates a) 10 mg in 0.25 ml TFA, diluted with THF or with DCM to a final concentration of 4 mg/ml; b) in TFA / DMF (1:9) diluted with THF to a final concentration of 10 mg/ml

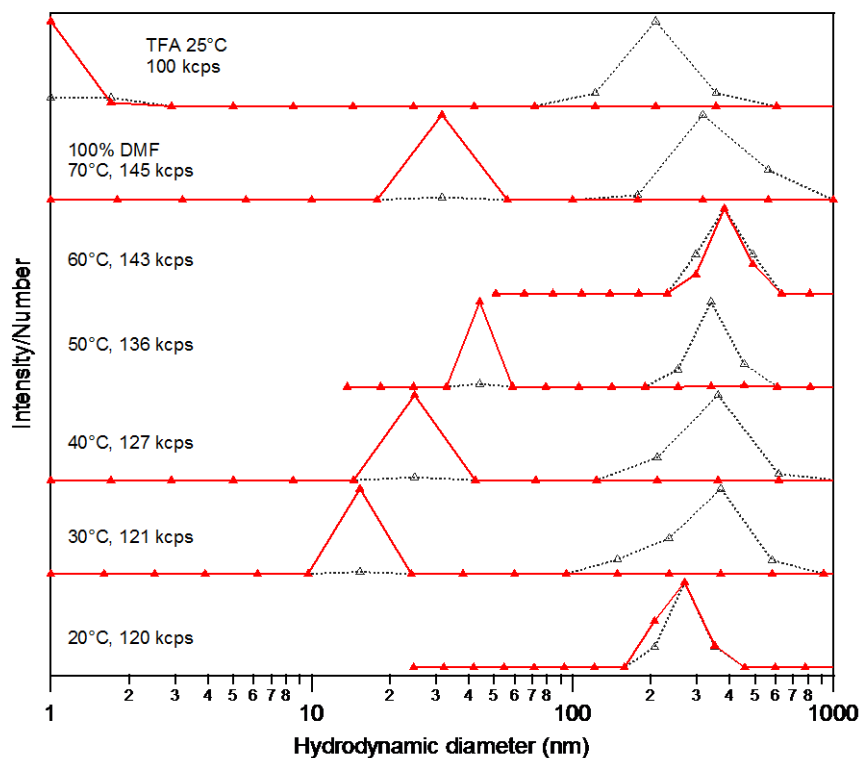

Figure S7: DLS intensity ( $\Delta$ ) and number ( $\blacktriangle$ ) distributions for 0.2 mM solutions of (pBA<sub>90</sub>)<sub>2</sub>-CP in TFA, and DMF heated to 70 °C

## SANS model output

pBA90-CP in DMF / TFA (3:1)

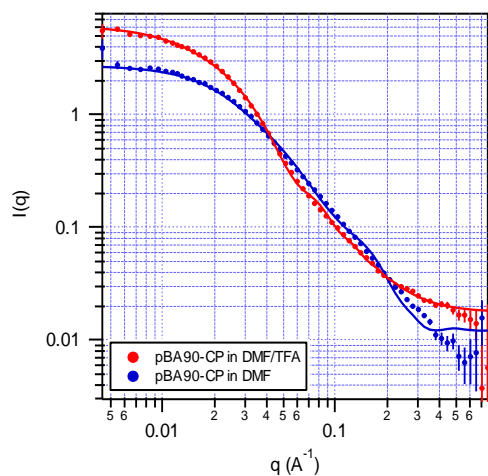

| Stacked disc model                               | pBA90-CP<br>TFA/DMF<br>(1:3) |
|--------------------------------------------------|------------------------------|
| Volume Fraction                                  | 0.10                         |
| Disc Radius (Å)                                  | 68.0                         |
| Core Thickness (Å)                               | 5.5                          |
| Layer Thickness (Å)                              | 7.7                          |
| Core SLD (Å <sup>-2</sup> / 10 <sup>6</sup> )    | 0.00                         |
| Layer SLD (Å <sup>-2</sup> / 10 <sup>6</sup> )   | 5.90                         |
| Solvent SLD (Å <sup>-2</sup> / 10 <sup>6</sup> ) | 6.09                         |
| # of Stacking                                    | 2.9                          |
| GSD of d-Spacing                                 | 6.0                          |
| Incoherent background (cm <sup>-1</sup> )        | 0.018                        |

Figure S8: SANS data for dilution of (pBA<sub>90</sub>)<sub>2</sub>-CP from TFA with DMF

Various DP's in THF / DMF / TFA (90 : 9 : 1)

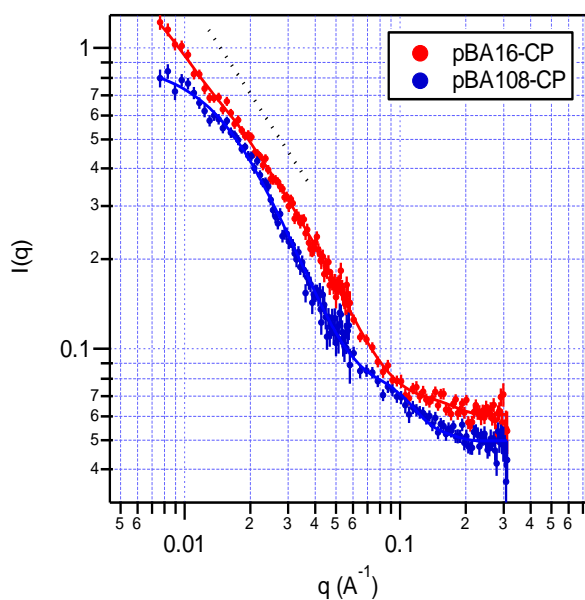

| Core-Shell-Shell Cylinder Model                  | pBA 16-CP | pBA 108-CP |
|--------------------------------------------------|-----------|------------|
| Volume Fraction                                  | 0.007     | 0.018      |
| Core radius (Å)                                  | 13.10     | 15.2       |
| Shell 1 thickness (Å)                            | 11.03     | 13.6       |
| Shell 2 thickness (Å)                            | 22.80     | 50.2       |
| Total Thickness (Å)                              | 46.9      | 79.0       |
| Core length (Å)                                  | >1000     | 203.2      |
| SLD core (Å <sup>-2</sup> / 10 <sup>6</sup> )    | 0.00      | 0.00       |
| SLD shell 1 (Å <sup>-2</sup> / 10 <sup>6</sup> ) | 5.83      | 6.04       |
| SLD shell 2 (Å <sup>-2</sup> / 10 <sup>6</sup> ) | 6.03      | 6.25       |
| SLD solvent (Å <sup>-2</sup> / 10 <sup>6</sup> ) | 6.36      | 6.36       |
| Incoherent background (cm <sup>-1</sup> )        | 0.060     | 0.049      |

Figure S9: SANS of pBA-CP dissolved in TFA/DMF (1:9) and diluted with THF (1:9)

Various DP's in DMF, TFA / THF and TFA / CDCl<sub>3</sub>

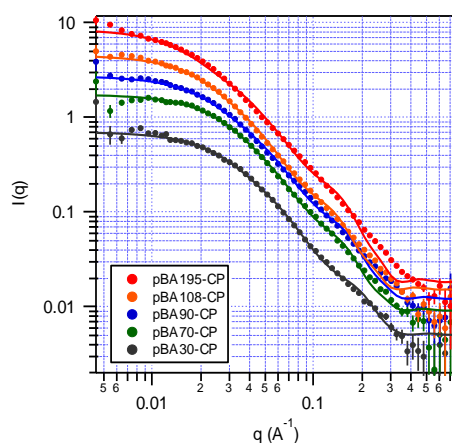

| Core-Shell-Shell (CSS) Cylinder Model            | pBA30-CP<br>25 °C | pBA70-CP<br>25 °C | pBA90-CP<br>25 °C | pBA108-CP<br>25 °C | pBA195-CP<br>25 °C |
|--------------------------------------------------|-------------------|-------------------|-------------------|--------------------|--------------------|
| Volume Fraction                                  | 0.034             | 0.093             | 0.120             | 0.149              | 0.235              |
| Core radius (Å)                                  | 9.8               | 10.3              | 10.1              | 11.3               | 10.7               |
| Shell 1 thickness (Å)                            | 25.2              | 14.4              | 15.3              | 19.3               | 17.0               |
| Shell 2 thickness (Å)                            | 8.3               | 26.1              | 24.1              | 27.5               | 26.1               |
| Total Thickness (Å)                              | 43.3              | 50.8              | 49.5              | 58.2               | 53.8               |
| Core length (Å)                                  | 142.0             | 135.8             | 176.3             | 186.1              | 259.3              |
| SLD core (Å <sup>-2</sup> / 10 <sup>6</sup> )    | 0.00              | 0.00              | 0.00              | 0.00               | 0.00               |
| SLD shell 1 (Å <sup>-2</sup> / 10 <sup>6</sup> ) | 6.56              | 6.45              | 6.53              | 6.51               | 6.55               |
| SLD shell 2 (Å <sup>-2</sup> / 10 <sup>6</sup> ) | 6.68              | 6.67              | 6.67              | 6.67               | 6.67               |
| SLD solvent (Å <sup>-2</sup> / 10 <sup>6</sup> ) | 6.79              | 6.79              | 6.79              | 6.79               | 6.79               |
| Incoherent background (cm <sup>-1</sup> )        | 0.005             | 0.009             | 0.012             | 0.015              | 0.018              |

Figure S10: SANS data for (pBA<sub>n</sub>)<sub>2</sub>-CP conjugates in *d*<sup>7</sup>-DMF

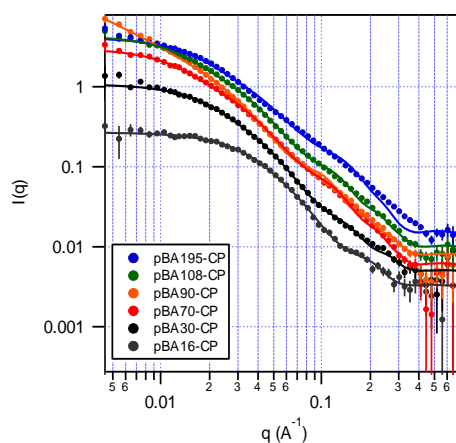

| Core-Shell-Shell Cylinder Model                  | pBA16-CP | pBA30-CP | pBA70-CP | pBA90-CP | pBA108-CP | pBA195-CP |
|--------------------------------------------------|----------|----------|----------|----------|-----------|-----------|
| Volume Fraction                                  | 0.010    | 0.055    | 0.142    | 0.181    | 0.263     | 0.283     |
| Core radius (Å)                                  | 10.2     | 9.0      | 9.4      | 8.7      | 8.8       | 9.7       |
| Shell 1 thickness (Å)                            | 20.0     | 20.0     | 20.0     | 20.0     | 20.0      | 20.0      |
| Shell 2 thickness (Å)                            | 7.3      | 25.2     | 36.3     | 47.4     | 35.4      | 27.7      |
| Total Thickness (Å)                              | 37.5     | 54.2     | 65.7     | 76.1     | 64.1      | 57.3      |
| Core length (Å)                                  | 102.1    | 190.3    | 312.9    | 3,525.8  | 292.6     | 244.2     |
| SLD core (Å <sup>-2</sup> / 10 <sup>6</sup> )    | -0.40    | -0.40    | -0.40    | -0.40    | -0.40     | -0.40     |
| SLD shell 1 (Å <sup>-2</sup> / 10 <sup>6</sup> ) | 5.77     | 5.74     | 5.84     | 5.79     | 5.86      | 5.99      |
| SLD shell 2 (Å <sup>-2</sup> / 10 <sup>6</sup> ) | 5.80     | 5.99     | 6.03     | 6.03     | 6.03      | 6.03      |
| SLD solvent (Å <sup>-2</sup> / 10 <sup>6</sup> ) | 6.09     | 6.09     | 6.09     | 6.09     | 6.09      | 6.09      |
| Incoherent background (cm <sup>-1</sup> )        | 0.0033   | 0.0050   | 0.0060   | 0.0080   | 0.0100    | 0.0150    |

Figure S11: SANS data for (pBA<sub>n</sub>)<sub>2</sub>-CP conjugates in TFA / THF (1:9) at 25 °C

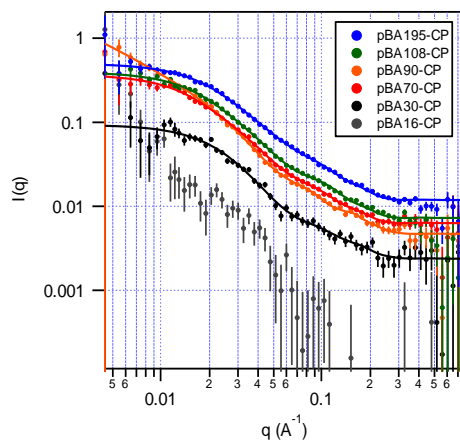

| Core-Shell-Shell Cylinder Model                  | pBA16-CP | pBA30-CP | pBA70-CP | pBA90-CP | pBA108-CP | pBA195-CP |
|--------------------------------------------------|----------|----------|----------|----------|-----------|-----------|
| Scale                                            | -        | 0.044    | 0.065    | 0.089    | 0.082     | 0.150     |
| Core radius (Å)                                  | -        | 10.7     | 12.1     | 10.2     | 11.7      | 12.1      |
| Shell 1 thickness (Å)                            | -        | 36.3     | 32.3     | 36.4     | 26.6      | 30.8      |
| Shell 2 thickness (Å)                            | -        | 31.6     | 37.0     | 47.4     | 36.1      | 36.3      |
| Total Thickness (Å)                              | -        | 78.6     | 81.3     | 94.0     | 74.4      | 79.2      |
| Core length (Å)                                  | -        | 123.8    | 250.0    | 4,413.3  | 213.2     | 187.7     |
| SLD core (Å <sup>-2</sup> / 10 <sup>6</sup> )    | -        | 0.00     | 0.00     | 0.00     | 0.00      | 0.00      |
| SLD shell 1 (Å <sup>-2</sup> / 10 <sup>6</sup> ) | -        | 3.15     | 3.14     | 3.14     | 3.15      | 3.16      |
| SLD shell 2 (Å <sup>-2</sup> / 10 <sup>6</sup> ) | -        | 3.20     | 3.20     | 3.20     | 3.19      | 3.20      |
| SLD solvent (Å <sup>-2</sup> / 10 <sup>6</sup> ) | -        | 3.22     | 3.22     | 3.22     | 3.22      | 3.22      |
| Incoherent background (cm <sup>-1</sup> )        | -        | 0.002    | 0.006    | 0.005    | 0.007     | 0.012     |

Figure S12: SANS data for (pBA<sub>n</sub>)<sub>2</sub>-CP conjugates in TFA / CDCl<sub>3</sub> (1:9)

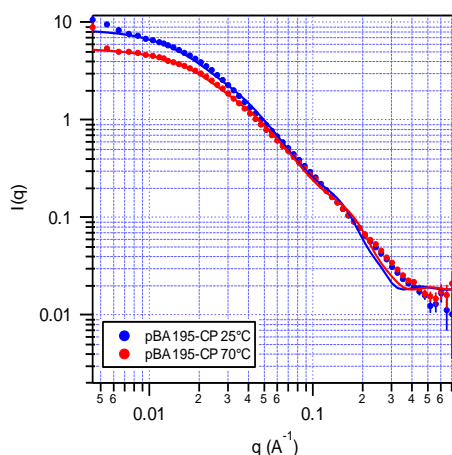

| Core-Shell-Shell (CSS) Cylinder Model            | pBA30-CP<br>70 °C | pBA70-CP<br>70 °C | pBA90-CP<br>70 °C | pBA108-CP<br>70 °C | pBA195-CP<br>70 °C |
|--------------------------------------------------|-------------------|-------------------|-------------------|--------------------|--------------------|
| Scale                                            | 0.034             | 0.093             | 0.120             | 0.149              | 0.235              |
| Core radius (Å)                                  | 9.7               | 8.9               | 9.0               | 9.7                | 9.6                |
| Shell 1 thickness (Å)                            | 0.3               | 6.5               | 7.3               | 10.9               | 10.8               |
| Shell 2 thickness (Å)                            | 32.4              | 26.9              | 25.5              | 27.8               | 26.1               |
| Total Thickness (Å)                              | 42.5              | 42.4              | 41.7              | 48.4               | 46.4               |
| Core length (Å)                                  | 130.4             | 133.5             | 157.4             | 176.3              | 214.4              |
| SLD core (Å <sup>-2</sup> / 10 <sup>6</sup> )    | 0.00              | 0.00              | 0.00              | 0.00               | 0.00               |
| SLD shell 1 (Å <sup>-2</sup> / 10 <sup>6</sup> ) | 6.56              | 6.45              | 6.53              | 6.51               | 6.55               |
| SLD shell 2 (Å <sup>-2</sup> / 10 <sup>6</sup> ) | 6.68              | 6.67              | 6.67              | 6.67               | 6.67               |
| SLD solvent (Å <sup>-2</sup> / 10 <sup>6</sup> ) | 6.79              | 6.79              | 6.79              | 6.79               | 6.79               |
| Incoherent background (cm <sup>-1</sup> )        | 0.0050            | 0.0090            | 0.0120            | 0.0150             | 0.0180             |

Figure S13: Effect of heating (pBA<sub>n</sub>)<sub>2</sub>-CP conjugates measured by SANS in DMF from 25 °C to 70 °C



## Tubes with deuterated cores:

Synthesis:

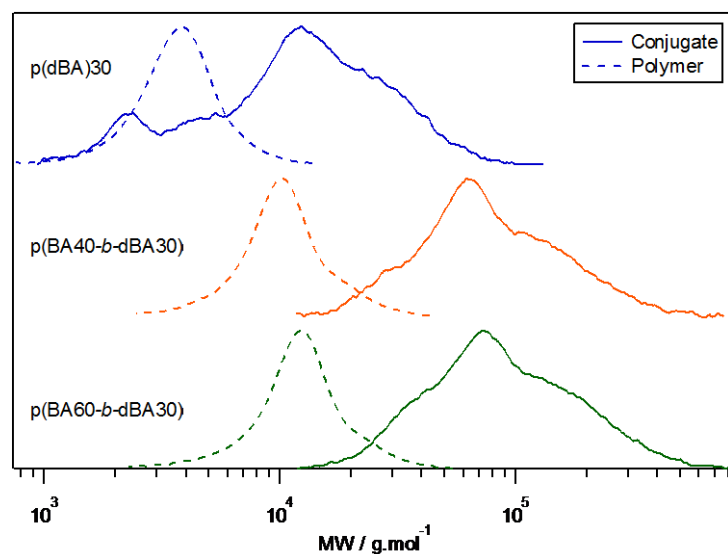

| Polymer                               |                                       | p(d9-BA)29 | p(d9-BA)29- <i>b</i> -BA45 | p(d9-BA)29- <i>b</i> -BA65 |
|---------------------------------------|---------------------------------------|------------|----------------------------|----------------------------|
| [M] : [CTA]                           |                                       | 35         | 45                         | 68                         |
| Polymerisation time (min)             |                                       | 130        | 130                        | 130                        |
| Conversion (X)                        |                                       | 90%        | 90%                        | 87%                        |
| Theoretical DP [a]                    |                                       | 31.3       | 40.5                       | 59.2                       |
| DP from 1H-NMR                        |                                       | 29         | 45                         | 65                         |
| Mn (g.mol <sup>-1</sup> ) from 1H-NMR |                                       | 4,200      | 9,904                      | 12,467                     |
| SEC: DMF + LiBr.                      | M <sub>n</sub> (g.mol <sup>-1</sup> ) | 3,350      | 9,350                      | 10,850                     |
| Conventional calibration              | M <sub>w</sub> / M <sub>n</sub>       | 1.19       | 1.22                       | 1.23                       |
| SEC: THF                              | M <sub>n</sub> (g.mol <sup>-1</sup> ) | 4,100      | 11,100                     | 13,400                     |
| Conventional calibration              | M <sub>w</sub> / M <sub>n</sub>       | 1.122      | 1.174                      | 1.172                      |
| SEC: THF                              | dn/dc [b]                             | 0.0588     | 0.0576                     | 0.0571                     |
| Light scattering                      | M <sub>n</sub> (g.mol <sup>-1</sup> ) | 5,200      | 13,000                     | 15,800                     |
|                                       | M <sub>w</sub> / M <sub>n</sub>       | 1.043      | 1.095                      | 1.093                      |

Figure S14: SEC traces of the three polymers and conjugates prepared from deuterated BA monomer. Notes: [a] Theoretical DP calculated based on conversion, measured by <sup>1</sup>H-NMR, [b] dn/dc calculated based on the assumption of 100% elution of the polymer by the SEC.

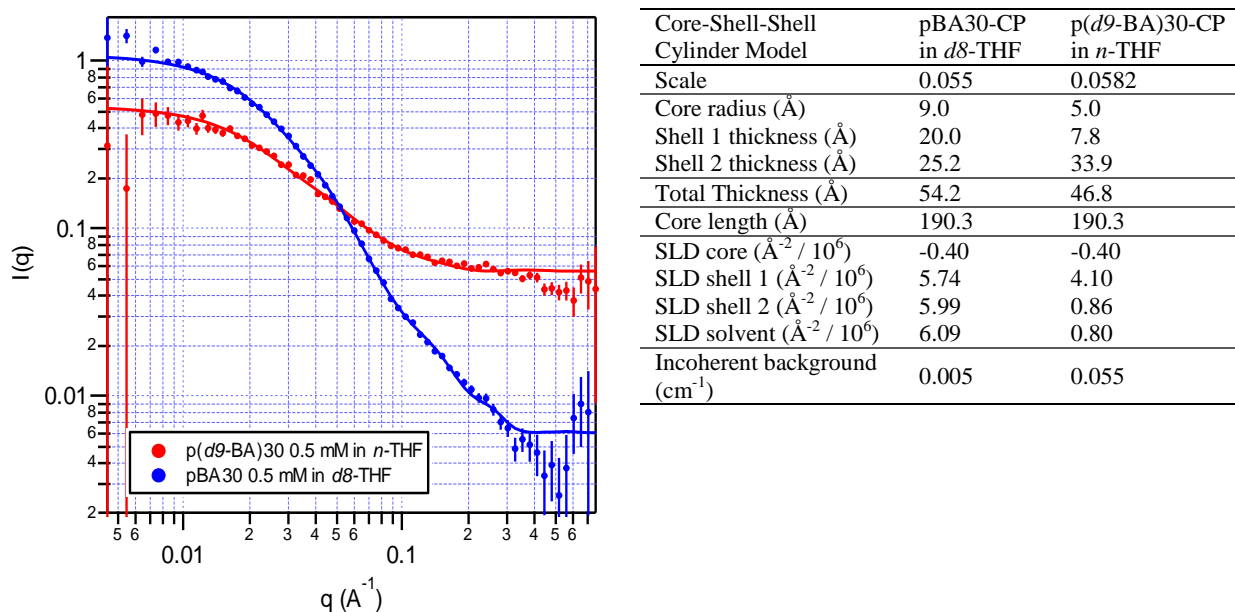

Figure S15: SANS pattern for [p(*d9*-BA)<sub>29</sub>]<sub>2</sub>-CP in *n*-THF/ *d*-TFA (9:1) compared to (pBA<sub>30</sub>)<sub>2</sub>-CP in *d8*-THF / *d*-TFA (9:1)

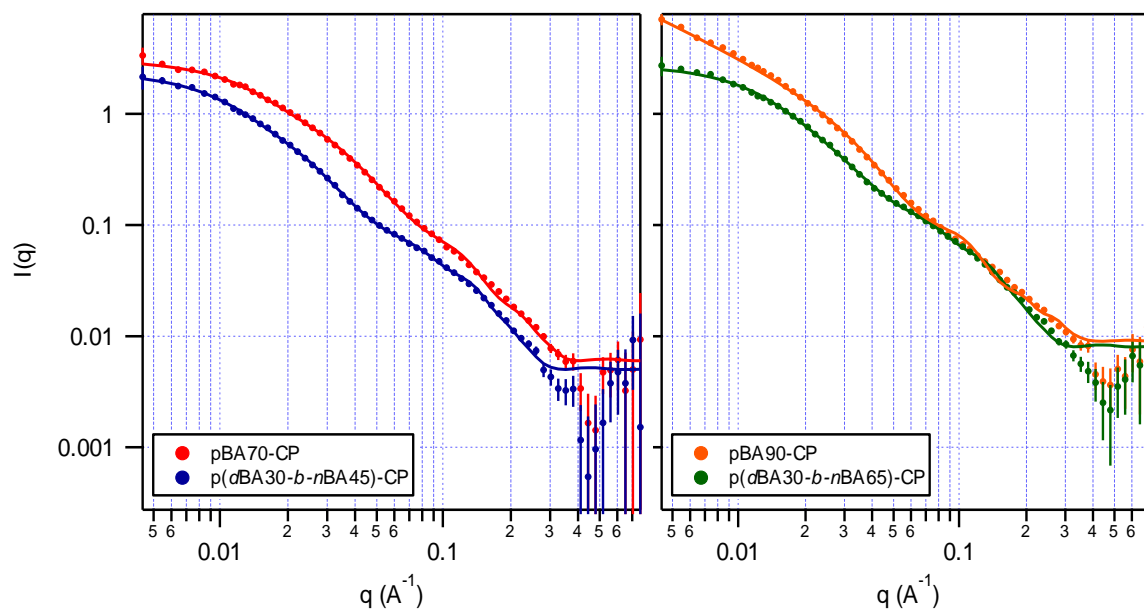

| Core-Shell-Shell (CSS) Cylinder Model            | pBA70-CP | p( <i>d9</i> -BA)29- <i>b</i> -BA45-CP | pBA90-CP | p( <i>d9</i> -BA)29- <i>b</i> -BA65-CP |
|--------------------------------------------------|----------|----------------------------------------|----------|----------------------------------------|
| Scale                                            | 0.142    | 0.127                                  | 0.181    | 0.160                                  |
| Core radius (Å)                                  | 9.4      | 11.2                                   | 8.7      | 12.0                                   |
| Shell 1 thickness (Å)                            | 20.0     | 45.1                                   | 20.0     | 47.3                                   |
| Shell 2 thickness (Å)                            | 36.3     | 43.3                                   | 47.4     | 41.6                                   |
| Total Thickness (Å)                              | 65.7     | 99.5                                   | 76.1     | 100.9                                  |
| Core length (Å)                                  | 312.9    | 380.1                                  | >1500    | 356.4                                  |
| SLD core (Å <sup>-2</sup> / 10 <sup>6</sup> )    | -0.40    | -0.40                                  | -0.40    | -0.40                                  |
| SLD shell 1 (Å <sup>-2</sup> / 10 <sup>6</sup> ) | 5.84     | 6.02                                   | 5.79     | 6.02                                   |
| SLD shell 2 (Å <sup>-2</sup> / 10 <sup>6</sup> ) | 6.03     | 6.06                                   | 6.03     | 6.06                                   |
| SLD solvent (Å <sup>-2</sup> / 10 <sup>6</sup> ) | 6.09     | 6.09                                   | 6.09     | 6.09                                   |
| Incoherent background (cm <sup>-1</sup> )        | 0.006    | 0.005                                  | 0.008    | 0.008                                  |

Figure S16: SANS pattern and fits for tubes with deuterated cores in *d8*-THF / *d*-TFA (9:1)

### SANS Error fitting:

The error in the length dimension from the model fitting, was obtained using the NIST IGOR Pro Macros. Once the best fit was obtained, all constants but the length were held constant, and the error in the length was determined. In all cases the error fit from the model was less than instrumental error, and so carries little real meaning. The error for conjugates assembled in 100% DMF at 25°C and 70°C are shown below.

Table S2: Model fitting errors for p(BA<sub>n</sub>)<sub>2</sub>-CP tubes in 100% DMF as measured by SANS

| Polymer DP | DMF, 25°C  |                         | DMF, 25°C  |                         |
|------------|------------|-------------------------|------------|-------------------------|
|            | Length (Å) | Model Fitting Error (Å) | Length (Å) | Model Fitting Error (Å) |
| 30         | 229        | 0.784                   | 215        | 0                       |
| 70         | 237        | 0.454                   | 218        | 0.843                   |
| 90         | 275        | 0.6                     | 241        | 0.513                   |
| 108        | 303        | 0.527                   | 273        | 0.564                   |
| 195        | 367        | 0.744                   | 307        | 0.568                   |

### Cross-linkable tubes

Synthesis:

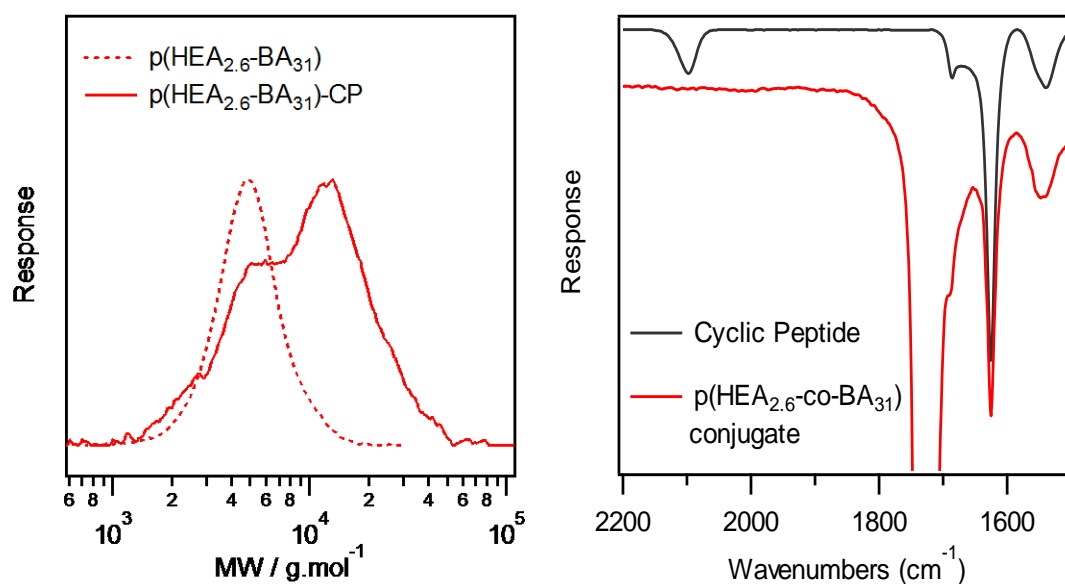

Figure S17: SEC and IR traces for p(HEA-co-BA) polymer and conjugate

DLS:

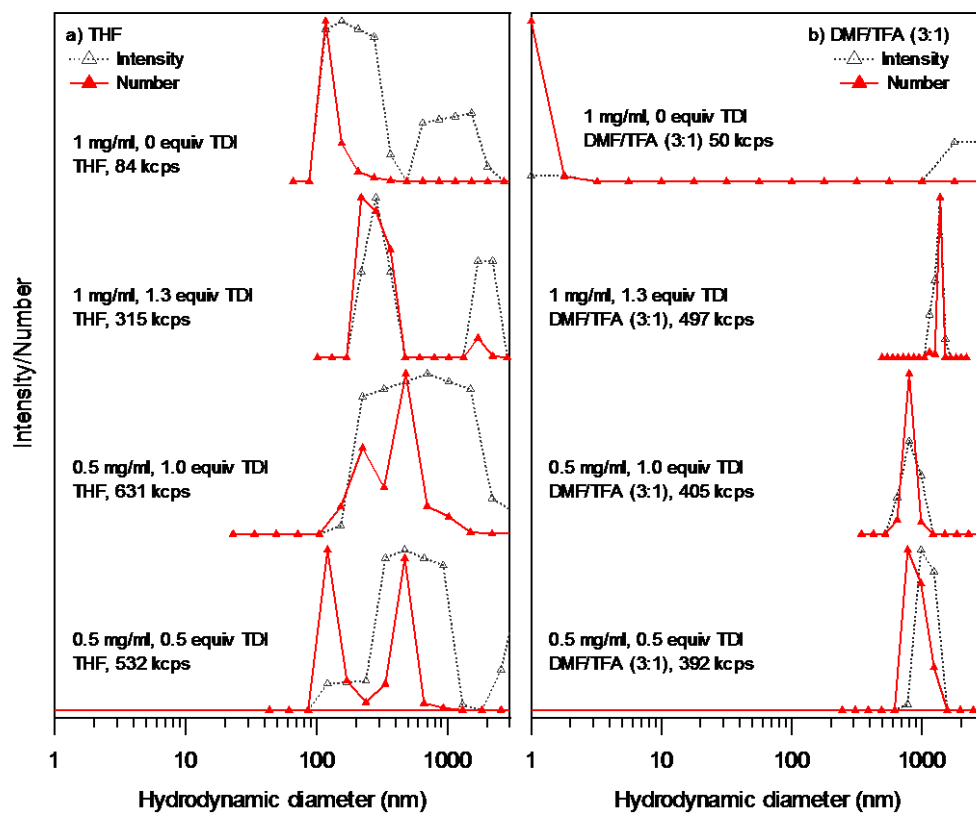

Figure S18: DLS intensity ( $\Delta$ ) and number ( $\blacktriangle$ ) distributions after cross-linking for 1 h of assembled  $(p(\text{HEA-co-BA}))_2\text{-CP}$  conjugates in a) THF, b) DMF/TFA (3:1) after 2h at 70 °C.
